# Supplementary material
Source: publisher figshare collection journal article supplement (https://acs.figshare.com/ndownloader/files/5110585)
Supplement: Supplementary file 1 [file 5110585]

**Layer by Layer Self-Assembled Polyelectrolyte Multilayers with Embedded  
Phospholipid Vesicles obtained by Spraying : Integrity of the Vesicles**

M. Michel<sup>1,2</sup>, A. Izquierdo<sup>2</sup>, G. Decher<sup>2</sup>, J.-C. Voegel<sup>1</sup>, P. Schaaf<sup>2,\*</sup>, V. Ball<sup>1</sup>

1 : Institut National de la Santé et de la Recherche Médicale

Unité 595

Faculté de Médecine.

11 rue Humann.

67085 Strasbourg Cedex.

2 : Centre National de la Recherche Scientifique.

Unité Propre 22, Institut Charles Sadron.

6 rue Boussingault.

67083 Strasbourg Cedex.

\* : to whom all correspondance should be addressed.

Phone : 0033 3 88 41 40 01

Fax : 0033 3 88 41 40 99

**Supporting information.**

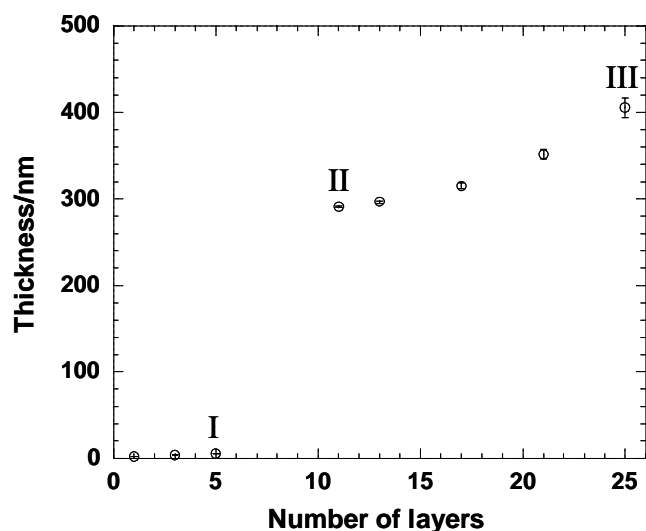

Figure 1: Evolution of the thickness increase of a PEI-(PGA/PAH)<sub>2</sub>-(PGA/SV)-(PGA/PAH)<sub>9</sub> multilayer obtained by the alternated spraying method. The different steps corresponds to the deposition of : Step I: PEI-(PGA/PAH); Step II: Step I +(PGA/SV)-(PGA/PAH)<sub>2</sub>; Step III: Step II +(PGA/PAH)<sub>7</sub>

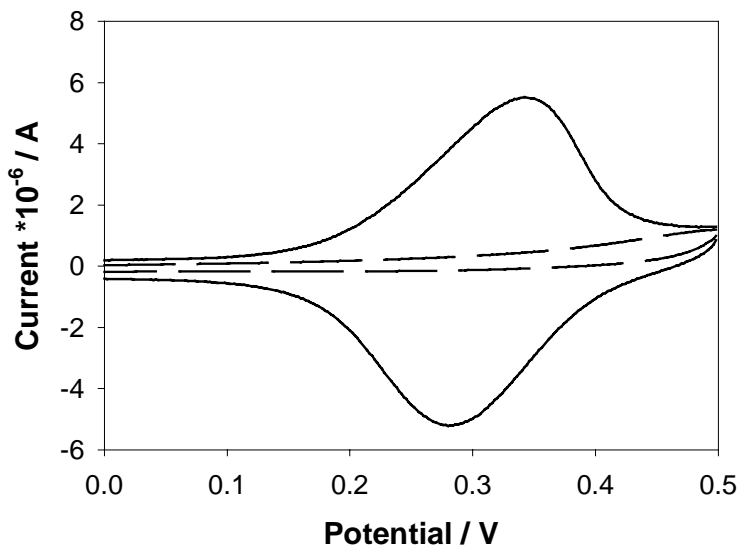

Figure 2: Cyclic voltamograms on the surface of a gold electrode covered with a PEI-(PGA/PAH)<sub>5</sub> multilayer onto which a 1 mM Fe(CN)<sub>6</sub><sup>4-</sup> solution was sprayed. Dashed line: capacitive current obtained before ferrocyanide spraying. Full line: 1 min. after spraying. The scan rate was equal to 200 mV.s<sup>-1</sup>.

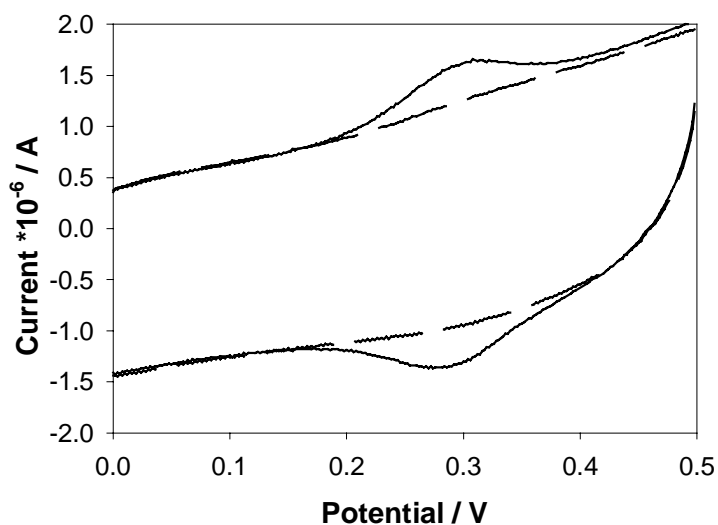

Figure 3: Cyclic voltamograms on the surface of a gold electrode onto which a PEI-(PGA/PAH)<sub>2</sub>-(NSV/PAH)-(PGA/PAH)<sub>2</sub> film was sprayed. In this experiment, the vesicles contained ferrocyanide ions.

Dashed line: signal for PEI-(PGA/PAH)<sub>2</sub> before spraying the non stabilized vesicles (capacitive current); full line: cyclic voltamogram obtained about 1 min. after film build up was achieved including non stabilized vesicles. The scan rate was equal to 200 mV.s<sup>-1</sup>.

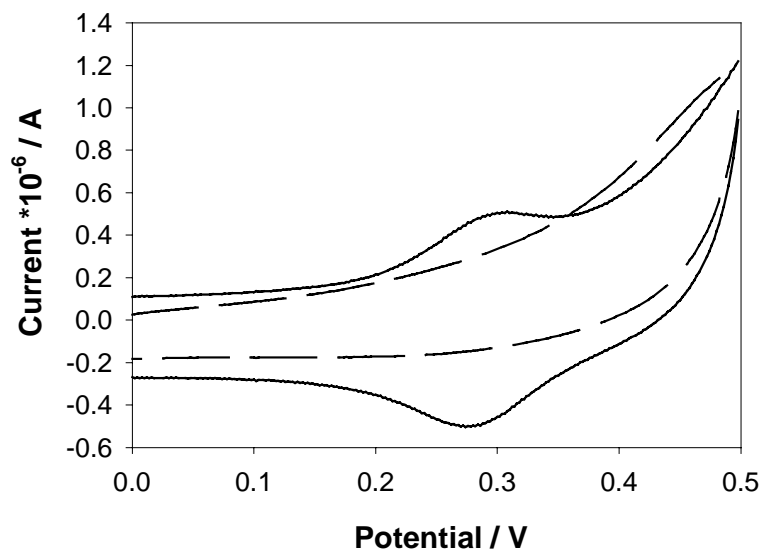

Figure 4: Cyclic voltamograms of a gold electrode covered with a PEI-(PGA/PAH)<sub>2</sub>-PGA film onto which stabilized vesicles (SV) were sprayed and kept uncovered. Dashed line: signal obtained before spraying the SV (capacitive current); full line: cyclic voltamogram obtained about 1 min after SV spraying was achieved. The scan rate was equal to 200 mV.s<sup>-1</sup>.
